# Supplementary material for: Microbial Communities in Underground Gas Reservoirs Offer Promising Biotechnological Potential
Source: MDPI journal article supplement (doi:10.3390/fermentation8060251), 2022-05-26

**Table S1** Overview on sampling and on physiochemical parameters measured in sampled wells

| Well  | Date of sampling | Type of sampling | temperature (°C) | redox potential (mV) | pH   | Conductivity (mS/cm) |
|-------|------------------|------------------|------------------|----------------------|------|----------------------|
| LO-A  | 12.6.2018        | subsurface       | 21.9             | -201.8               | 7.85 | 4.56                 |
| LO-B  | 12.10.2018       | subsurface       | 12.6             | -208                 | 7.62 | 3.79                 |
| LO-C  | 12.6.2018        | overflow         | 25.8             | -138.5               | 7.83 | 3.9                  |
|       | 29.10.2018       | overflow         | 26.3             | -460                 | 7.61 | 3.89                 |
|       | 11.11.2019       | overflow         | 25.6             | -250                 | 7.54 | 3.85                 |
| LO-D  | 29.10.2018       | overflow         | 26.2             | -370                 | 7.7  | 3.9                  |
|       | 11.11.2019       | overflow         | 25.5             | -293                 | 7.82 | 3.57                 |
| LO-E  | 12.11.2019       | overflow         | 24.9             | -245                 | 7.5  | 3.73                 |
| LO-F  | 17.5.2018        | overflow         | 28.4             | -169.7               | 7.9  | 3.7                  |
|       | 11.11.2019       | overflow         | 27.0             | -280.0               | 7.8  | 3.7                  |
| LO-G  | 31.10.2018       | overflow         | 15,5             | -188                 | 8,7  | 6,7                  |
| LO-G  | 12.11.2019       | subsurface       | 20.8             | -188.7               | 8.6  | 6.6                  |
| LO-H  | 12.11.2019       | overflow         | 19.6             | -170.1               | 8.4  | 6.4                  |
| LO-H  | 31.10.2018       | subsurface       | 14.5             | -174.5               | 8.4  | 6.3                  |
| LO-I  | 7.3.2019         | overflow         |                  | -319                 | 9.3  | 3                    |
| DUN-A | 22.10.2018       | subsurface       | 43.4             |                      | 8.9  | 77.4                 |
| DUN-B | 19.12.2018       | subsurface       | 40.4             |                      | 8.2  |                      |
| DUN-C | 23.10.2018       | subsurface       | 33.9             |                      | 8.3  | 38.5                 |
| TVR-A | 4.3.2019         | subsurface       | 46               |                      | 8    |                      |
| TVR-B | 5.4.2019         | subsurface       | 17               | -130                 | 8.1  | 19.2                 |

**Table S2** Table of gas composition measured in sampled wells

| Well  | date of sampling | methane  | carbon dioxide | oxygen   | nitrogen | helium   | hydrogen | ethane   | propane  | i-butane | n-butane | neopentane |
|-------|------------------|----------|----------------|----------|----------|----------|----------|----------|----------|----------|----------|------------|
|       |                  | (vol. %) | (Vol. %)       | (vol. %) | (vol. %) | (vol. %) | (vol. %) | (vol. %) | (vol. %) | (vol. %) | (vol. %) | (vol. %)   |
| LO-A  | 12.6.2018        | 92.92    | 2.958          | <0.005   | 2.47     | 0.018    | < 0.001  | 1.348    | 0.226    | 0.024    | 0.025    | < 0.001    |
| LO-B  | 12.6.2018        | 55.86    | 0.069          | <0.005   | 43.99    | 0.069    | < 0.001  | 0.003    | < 0.001  | < 0.001  | < 0.001  | < 0.001    |
| LO-C  | 12.6.2018        | 60.93    | 4.204          | <0.005   | 34.48    | 0.382    | < 0.001  | 0.003    | < 0.001  | < 0.001  | < 0.001  | < 0.001    |
|       | 29.10.2018       | 60.33    | 4.146          | <0.005   | 35.14    | 0.367    | < 0.001  | 0.003    | < 0.001  | < 0.001  | < 0.001  | < 0.001    |
|       | 11.11.2019       | 62.23    | 4.481          | <0.005   | 32.98    | 0.311    | < 0.001  | 0.002    | < 0.001  | < 0.001  | < 0.001  | < 0.001    |
| LO-D  | 29.10.2018       | 70.58    | 1.568          | <0.005   | 27.5     | 0.182    | 0.001    | 0.16     | 0.013    | < 0.001  | < 0.001  | < 0.001    |
|       | 11.11.2019       | 77.55    | 1.397          | <0.005   | 20.6     | 0.195    | < 0.001  | 0.253    | 0.018    | 0.001    | < 0.001  | < 0.001    |
| LO-E  | 12.11.2019       | 65.31    | 2.98           | <0.005   | 31.36    | 0.351    | < 0.001  | 0.003    | < 0.001  | < 0.001  | < 0.001  | < 0.001    |
| LO-F  | 17.5.2018        | 63.5     | 1.624          | <0.005   | 34.53    | 0.342    | < 0.001  | 0.002    | < 0.001  | < 0.001  | < 0.001  | < 0.001    |
|       | 11.11.2019       | 69.1     | 1.608          | <0.005   | 28.93    | 0.362    | < 0.001  | 0.002    | < 0.001  | < 0.001  | < 0.001  | < 0.001    |
| LO-I  | 7.3.2019         | 95.67    | 0.014          | <0.005   | 2.85     | 0.02     | < 0.001  | 1.089    | 0.257    | 0.042    | 0.042    | < 0.001    |
| DUN-A | 22.10.2018       | 99.5     | 0.003          | <0.005   | 0.25     | 0.016    | 0.001    | 0.2      | 0.019    | 0.004    | 0.002    | <0.005     |
| DUN-B | 19.10.2018       | 99.35    | 0.009          | <0.005   | 0.14     | 0.013    | <0.001   | 0.434    | 0.049    | 0.007    | 0.004    | <0.006     |
| DUN-C | 23.10.2018       | 99.64    | 0.007          | <0.005   | 0.17     | 0.013    | 0.001    | 0.158    | 0.008    | 0.001    | <0.001   | <0.003     |
| DUN-D | 18.10.2018       | 98.64    | 0.021          | <0.005   | 1.14     | 0.016    | 0.003    | 0.145    | 0.024    | 0.003    | 0.003    | <0.004     |

|              |          |       |       |        |      |       |         |       |       |         |         |         |
|--------------|----------|-------|-------|--------|------|-------|---------|-------|-------|---------|---------|---------|
| <b>TVR-A</b> | 4.3.2019 | 99.68 | 0.072 | <0.005 | 0.1  | 0.004 | < 0.001 | 0.146 | 0.001 | < 0.001 | < 0.001 | < 0.001 |
| <b>TVR-B</b> | 5.3.2019 | 99.54 | 0.18  | <0.005 | 0.07 | 0.004 | < 0.001 | 0.173 | 0.005 | 0.003   | 0.005   | < 0.001 |

**Table S3** Primer sequences for Illumina analysis

|         |                                                                             |
|---------|-----------------------------------------------------------------------------|
| hypotFW | AATGATACGGCGACCACCGAGATCTACACGCTGxxxxxxxTATGGTAA<br>TTGTGTGYCAGCMGCCGCGGTAA |
| REV     | CAAGCAGAAGACGGCATACGAGATTCxxxxxxxGTCAGCCAGCCGGA<br>CTACNVGGGTWTCTAAT        |
| Seq1    | TATGGTAATTGTGTGYCAGCMGCCGCGGTAA                                             |
| Seq2    | AGTCAGCCAGCCGGACTACNVGGGTWTCTAAT                                            |
| Index1  | ATTAGAWACCCBNGTAGTCCGGCTGGCTGACT                                            |
| Index2  | TTACCGCGGCKGCTGRCACACAATTACCATA                                             |

**Table S4** Results of isotopic analysis of degas water and injected gas.

| well         | Date of sampling | $\delta^{13}\text{C}$ in $\text{CH}_4$ (‰) | $\delta\text{D}$ in $\text{CH}_4$ (‰) measured | $\delta\text{D}$ in $\text{H}_2\text{O}$ (‰) | $\delta\text{D}$ ( $\text{CH}_4$ ) (‰) corrected |
|--------------|------------------|--------------------------------------------|------------------------------------------------|----------------------------------------------|--------------------------------------------------|
| TVR-A        | 4.3.2019         | -57.9                                      | -194.6                                         | -32.3                                        | -162.3                                           |
| TVR-B        | 5.3.2019         | -53.6                                      | -188.4                                         | -24.9                                        | -163.5                                           |
| DUN-A        | 22.10.2018       | -62.7                                      | -212.3                                         | -26.1                                        | -186.1                                           |
| DUN-B        | 18.10.2018       | -62                                        | -202.2                                         | -33.8                                        | -168.4                                           |
| LO-A         | 12.6.2018        | -74.2                                      | -263.1                                         | -77.4                                        | -185.7                                           |
| LO-B         | 29.10.2018       | -77.8                                      | -237.1                                         | -76.3                                        | -160.8                                           |
| Injected gas | 8.7.2020         | -43.6                                      | -229.8                                         |                                              |                                                  |

**Table S5** Absolute quantification of mcr-A gene via qPCR (gene copies per ml).

| well no. m/y | mcrA gcp |
|--------------|----------|--------------|----------|--------------|----------|--------------|----------|
| LO-A 6/18    | 4.40E+04 | LO-D 10/18   | 2.03E+07 | LO-G 10/18   | 6.55E+03 | DUN-A 10/18  | 1.7E+05  |
| LO-B 6/18    | 2.77E+04 | LO-D 11/19   | 1.7E+03  | LO-G 11/19   | 1.33E+04 | DUN-B 12/18  | -        |
| LO-C 6/18    | 9.89E+03 | LO-E 11/19   | 4.57E+04 | LO-H 10/18   | -        | DUN-C 10/18  | 1.03E+06 |
| LO-C 10/18   | 2.4E+07  | LO-F 5/18    | 2.00E+02 | LO-H 11/19   | -        | TVR-A 3/19   | 1.86E+04 |
| LO-C 11/19   | 2.78E+03 | LO-F 11/19   | 6.13E+06 | LO-I 3/19    | -        | TVR-B 4/19   | 1.42E+06 |

**Table S6** Table of Illumina reads for DADA2 analysis

|    | sample      | input  | filtered | denoisedF | denoisedR | merged | nonchim |
|----|-------------|--------|----------|-----------|-----------|--------|---------|
| 1  | LO-A 6/18   | 134872 | 130780   | 129796    | 130078    | 127292 | 123206  |
| 2  | LO-B 10/18  | 176721 | 171244   | 170204    | 170523    | 166085 | 159352  |
| 3  | LO-C 10/18  | 136802 | 132175   | 131797    | 131931    | 129928 | 128992  |
| 4  | LO-D 11/19  | 190299 | 184398   | 182755    | 183250    | 175668 | 171798  |
| 6  | LO-F 11/19  | 134772 | 131044   | 130330    | 130573    | 129531 | 129272  |
| 7  | LO-G 11/19  | 175037 | 170306   | 169181    | 169492    | 164117 | 158386  |
| 8  | LO-H 11/19  | 167434 | 162934   | 162119    | 162405    | 158156 | 150821  |
| 9  | DUN-A 10/18 | 119984 | 116781   | 116417    | 116461    | 115645 | 115050  |
| 10 | DUN-B 12/18 | 151156 | 146909   | 146422    | 146548    | 143378 | 135907  |
| 11 | DUN-C 10/18 | 240131 | 233716   | 232843    | 233179    | 227040 | 204513  |
| 12 | TVR-A 3/19  | 264170 | 258140   | 257010    | 257504    | 255069 | 250471  |
| 14 | TVR-B 4/19  | 121949 | 118540   | 118281    | 118340    | 117193 | 116084  |
| 17 | LO-D 10/18  | 130538 | 125959   | 124539    | 125006    | 117653 | 109756  |
| 18 | LO-E 11/19  | 153548 | 147855   | 147167    | 147517    | 143246 | 135229  |
| 19 | LO-F 5/18   | 189416 | 184085   | 182962    | 183220    | 178740 | 171122  |
| 20 | LO-G 10/18  | 245591 | 240339   | 239812    | 239849    | 235933 | 195883  |
| 21 | LO-H 10/18  | 130287 | 126456   | 125793    | 126034    | 123906 | 114428  |
| 22 | LO-I 3/19   | 107968 | 104975   | 104615    | 104659    | 103129 | 94616   |
| 23 | LO-C 6/18   | 224348 | 218448   | 217340    | 217808    | 212573 | 203747  |
| 24 | LO-C 11/19  | 151509 | 147686   | 146804    | 147137    | 143931 | 142458  |

**Figure S1** Piper and Durov diagrams for groundwaters sampled at UGS Lobodice, UGS Tvrdonice, and UGS Dunajovice

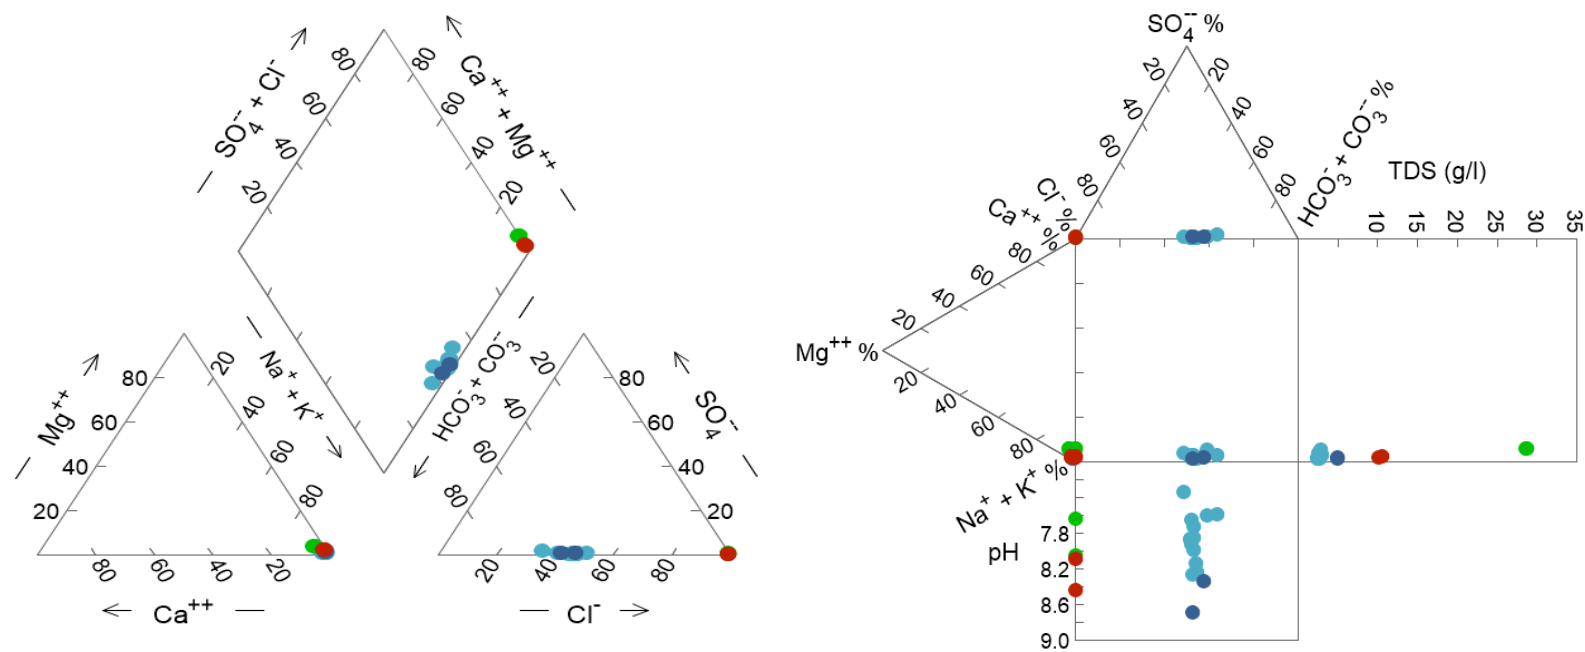

**Figure S2** Stability pH-Eh diagrams for carbon (a), nitrogen (b), and sulfur (c) dissolved components. Diagrams were prepared for UGS Lobodice groundwater conditions. for conditions of UGS Tvrdonice and UGS Dunajovice are not significantly different. (d) Speciation of carbon dissolved species in dependence on redox potential.

a

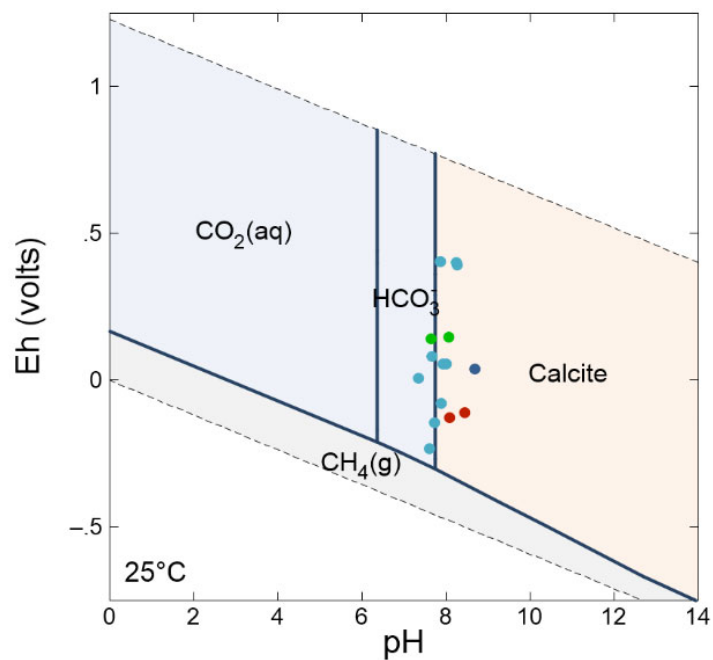

b

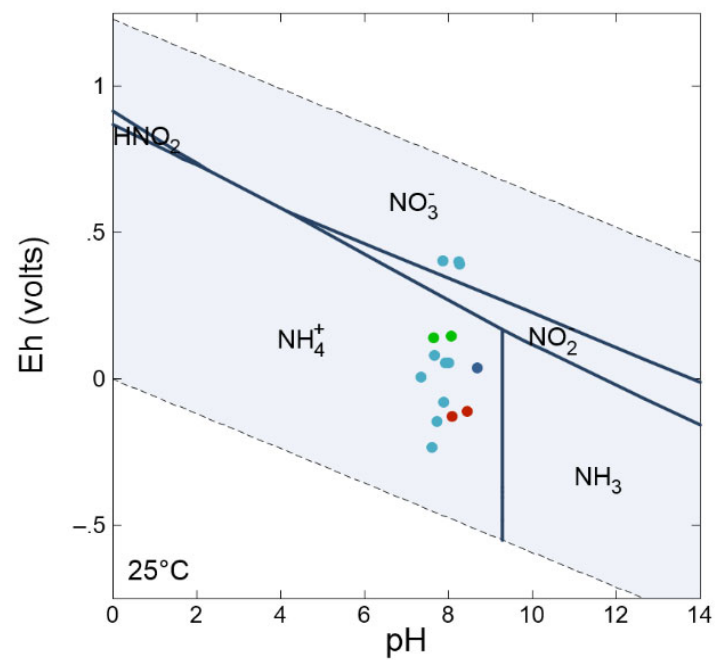

c

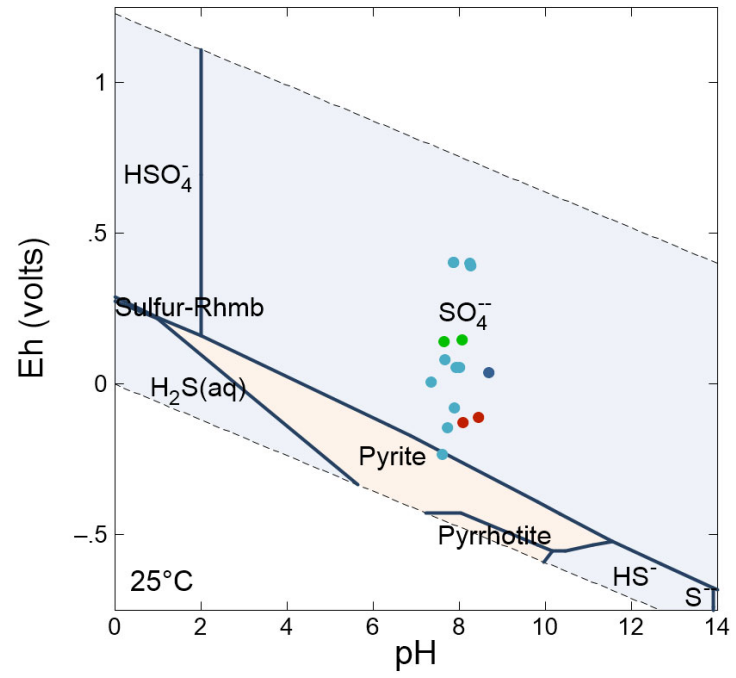

d

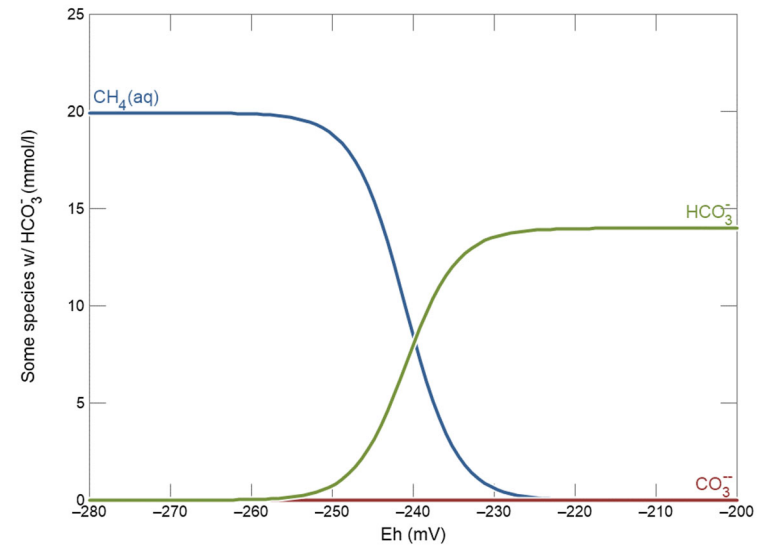



**Figure S3** Rarefaction curve

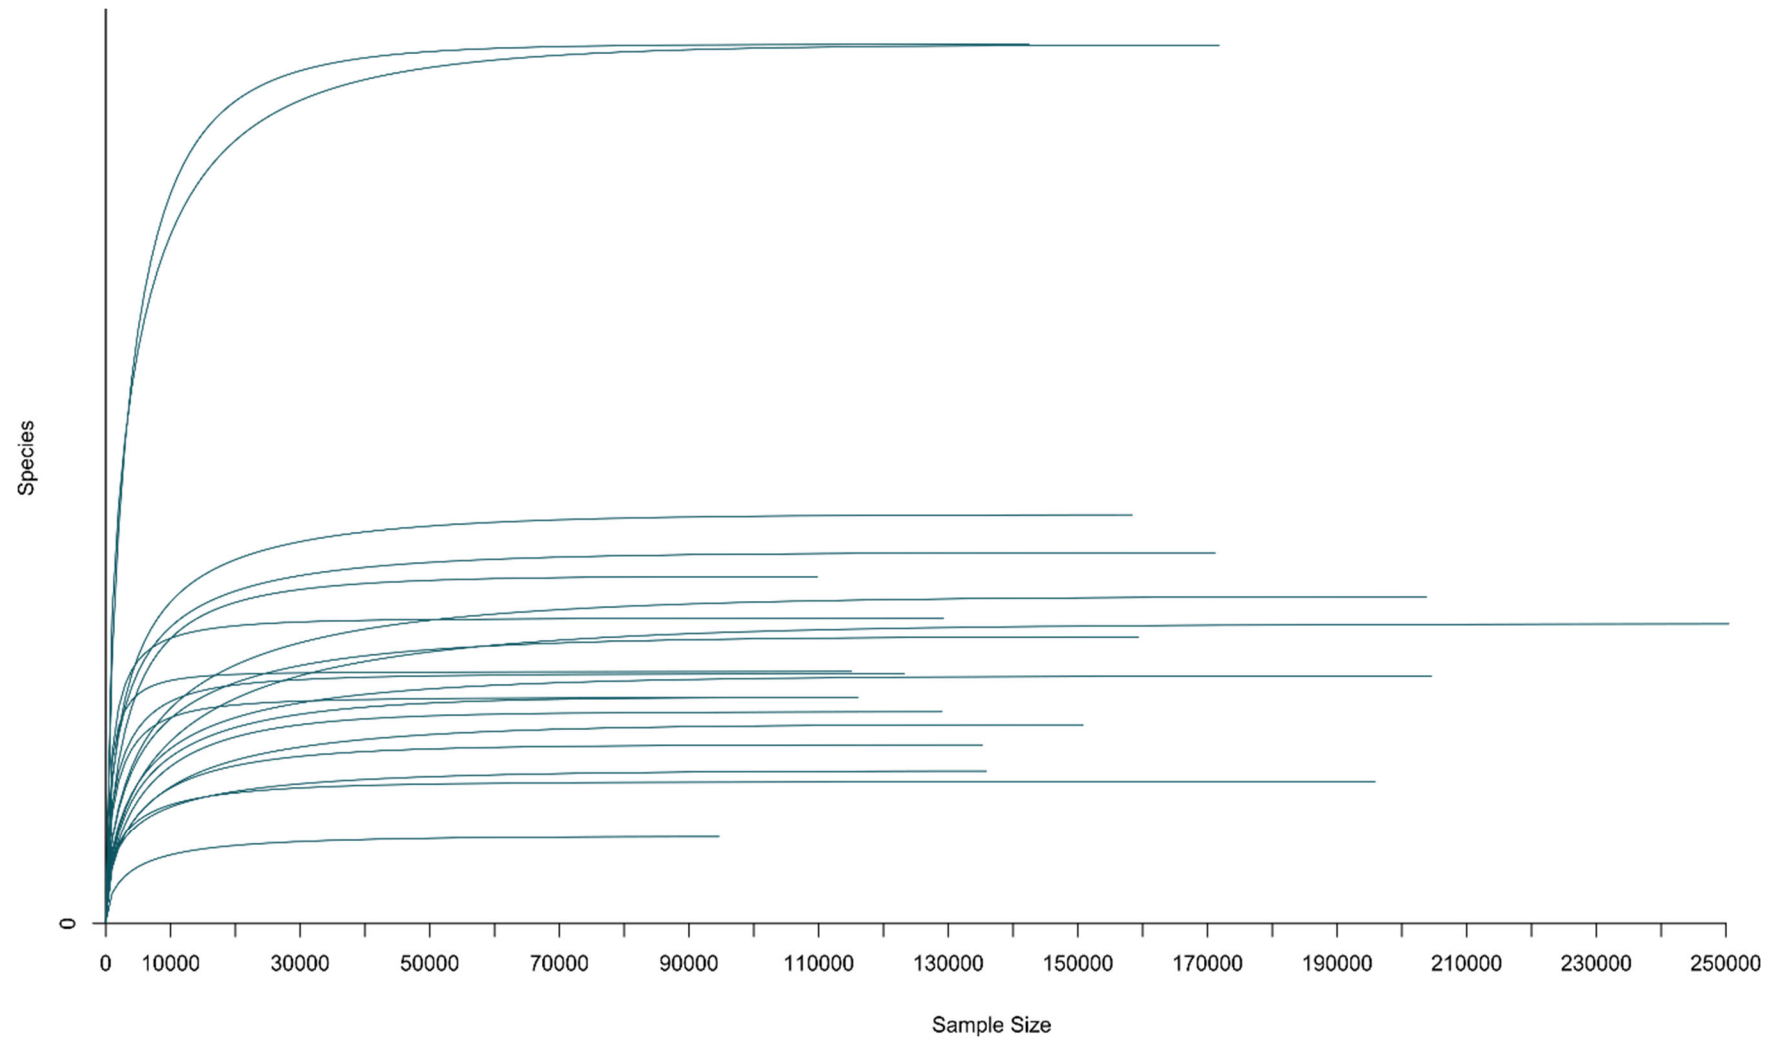

**Figure S4** Physical-chemistry well water properties in different sites and composition of archaeal community.

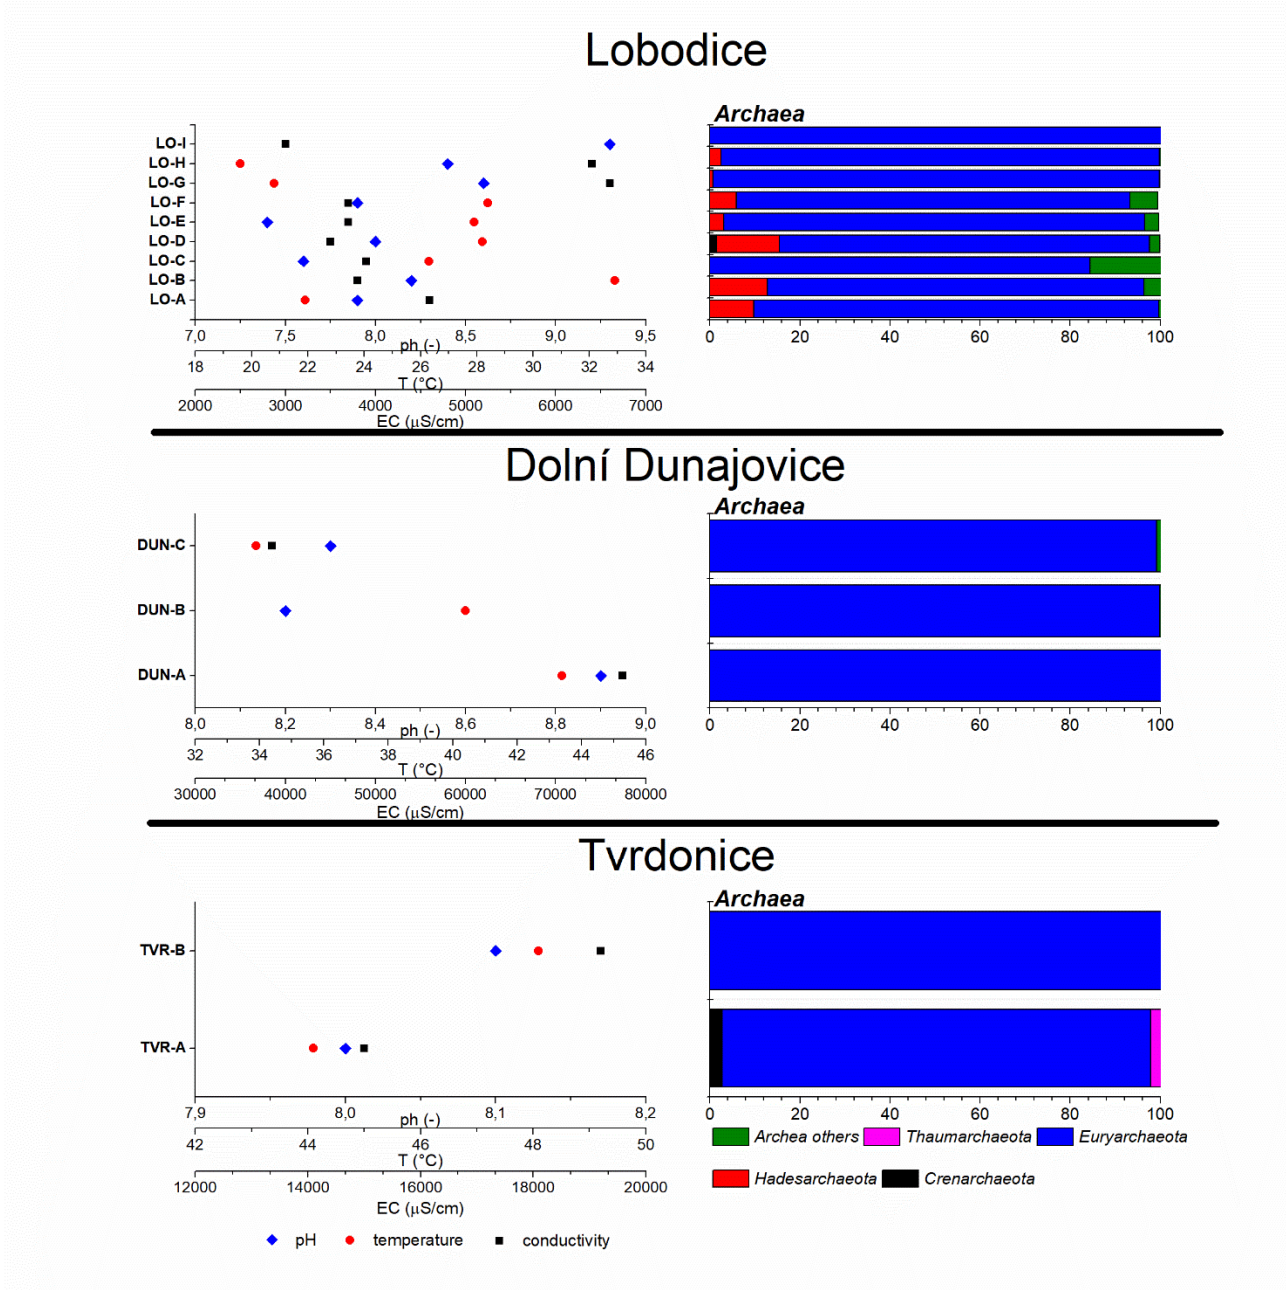

**Figure S5** The Alpha biodiversity index (Shannon) of sampled wells

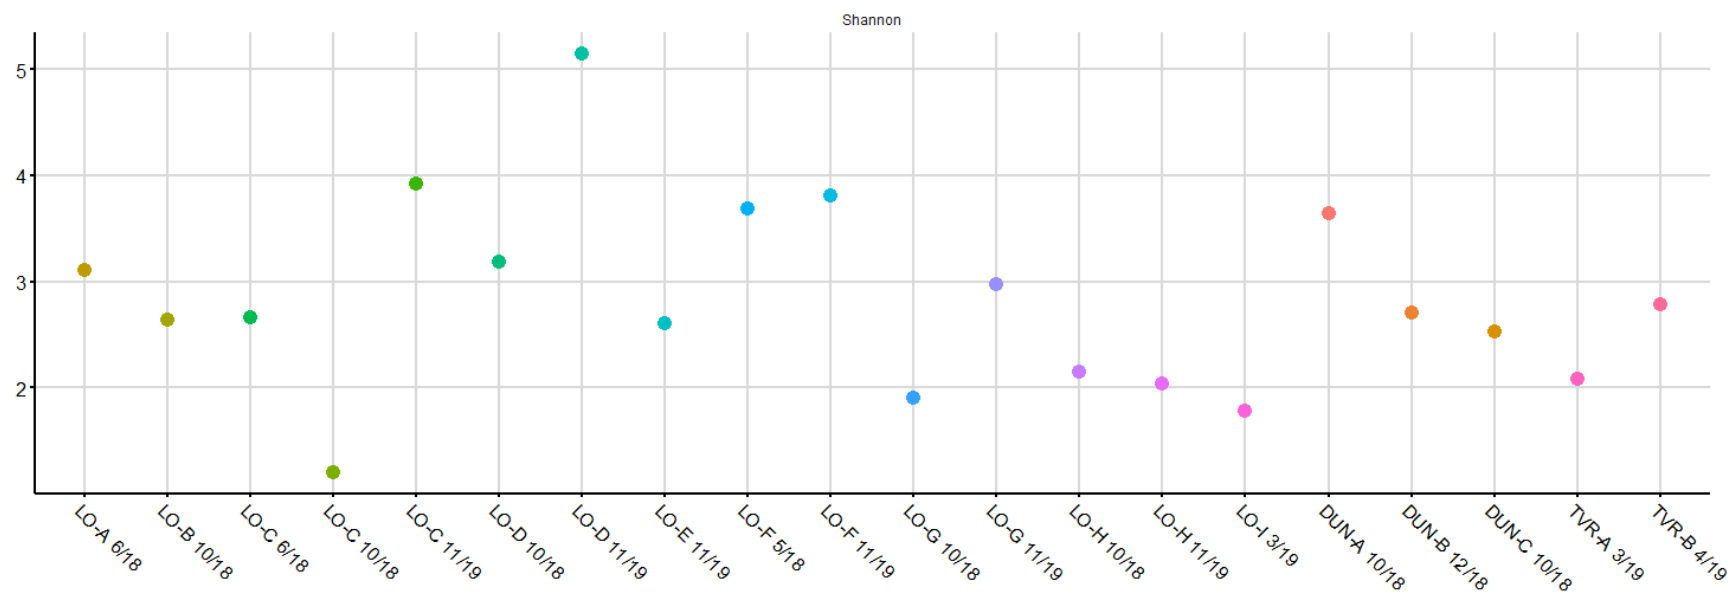

**Figure S6** The Beta biodiversity index (unweighted UniFrac) of sampled wells

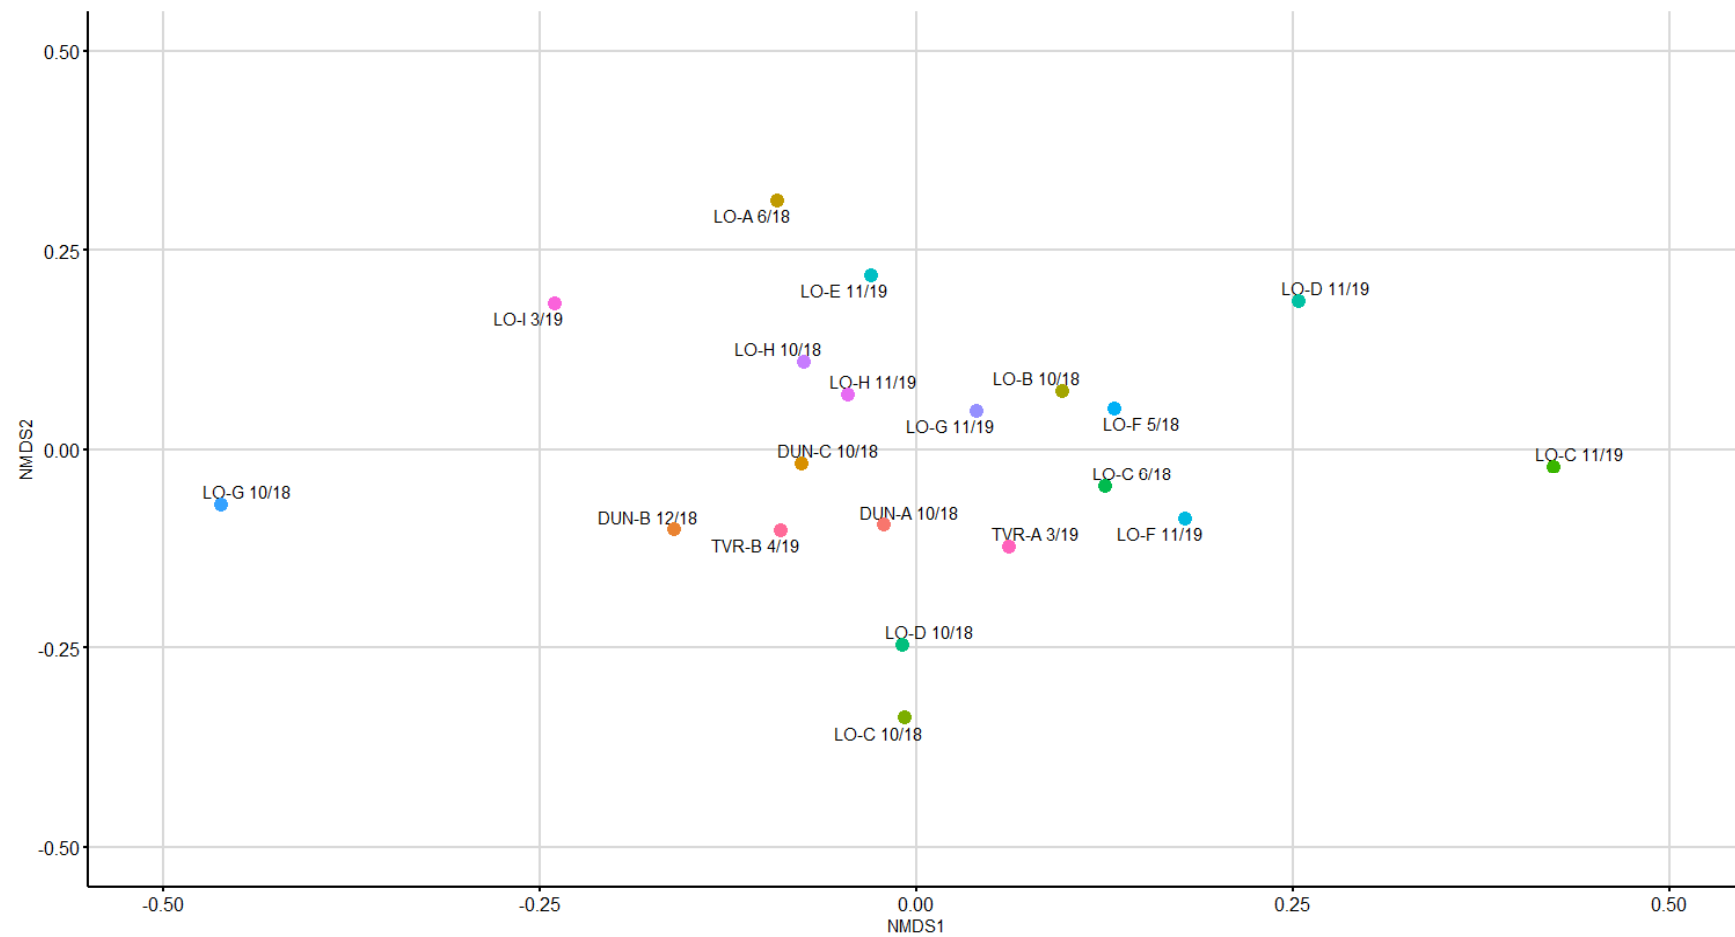

Supplement: s1 [file s1]
